# Supplementary material for: Rapid microfluidic screening of CO2 solubility and diffusion in pure and mixed solvents
Source: Royal Society of Chemistry journal article supplement (doi:10.1039/c2lc40260b), 2012-01-01
Supplement: c2lc40260b.pdf [file c2lc40260b.pdf]

# Supplementary information: Rapid Microfluidic Screening of CO<sub>2</sub> Solubility and Diffusion in Pure and Mixed Solvents †

Stéphanie G. R. Lefortier<sup>a,c</sup>, Peter J. Hamersma<sup>a</sup>, André Bardow<sup>b,c</sup> and Michiel T. Kreutzer<sup>\*a</sup>

Received Xth XXXXXXXXXXXX 20XX, Accepted Xth XXXXXXXXXXXX 20XX

First published on the web Xth XXXXXXXXXXXX 200X

DOI: 10.1039/b000000x

## ternary mixture data

| composition |      |       | $x(-)$ | $D (10^{-9} \text{ m}^2/\text{s})$ |
|-------------|------|-------|--------|------------------------------------|
| IL          | NMP  | Depeg |        |                                    |
| 1.00        | 0.00 | 0.00  | 0.030  | 0.37                               |
| 0.00        | 1.00 | 0.00  | 0.014  | 2.01                               |
| 0.00        | 0.00 | 1.00  | 0.041  | 1.09                               |
| 0.50        | 0.50 | 0.00  | 0.023  | 0.91                               |
| 0.25        | 0.75 | 0.00  | 0.020  | 0.95                               |
| 0.99        | 0.01 | 0.00  | 0.030  | 0.58                               |
| 0.98        | 0.02 | 0.00  | 0.027  | 0.37                               |
| 0.97        | 0.03 | 0.00  | 0.028  | 0.42                               |
| 0.96        | 0.04 | 0.00  | 0.026  | 0.33                               |
| 0.94        | 0.06 | 0.00  | 0.028  | 0.60                               |
| 0.85        | 0.15 | 0.00  | 0.025  | 0.26                               |
| 0.75        | 0.25 | 0.00  | 0.022  | 0.78                               |
| 0.70        | 0.30 | 0.00  | 0.025  | 0.20                               |
| 0.60        | 0.40 | 0.00  | 0.024  | 0.27                               |
| 0.95        | 0.05 | 0.00  | 0.029  | 0.68                               |
| 0.95        | 0.05 | 0.00  | 0.027  | 0.35                               |
| 0.90        | 0.10 | 0.00  | 0.026  | 0.43                               |
| 0.85        | 0.15 | 0.00  | 0.024  | 0.45                               |
| 0.80        | 0.20 | 0.00  | 0.024  | 0.61                               |
| 0.67        | 0.33 | 0.00  | 0.021  | 0.87                               |
| 0.60        | 0.40 | 0.00  | 0.018  | 0.75                               |
| 0.40        | 0.60 | 0.00  | 0.018  | 0.79                               |

<sup>a</sup>Dept. of Chemical Engineering, Delft University of Technology, Julianalaan 136, 2628 BL, Delft, The Netherlands

<sup>b</sup>Institute of Technical Thermodynamics, RWTH Aachen University, Schinkelstr. 8, 52062 Aachen, Germany

<sup>c</sup>Dept. of Process and Energy, Delft University of Technology, Leeghwaterstraat 44, 2628 CA, Delft, The Netherlands

---

| composition |      |       | $x(-)$ | $D (10^{-9} \text{ m}^2/\text{s})$ |
|-------------|------|-------|--------|------------------------------------|
| IL          | NMP  | Depeg |        |                                    |
| 0.30        | 0.70 | 0.00  | 0.017  | 0.84                               |
| 0.20        | 0.80 | 0.00  | 0.017  | 1.59                               |
| 0.10        | 0.90 | 0.00  | 0.014  | 1.31                               |
| 0.00        | 0.10 | 0.90  | 0.032  | 1.13                               |
| 0.00        | 0.20 | 0.80  | 0.028  | 1.04                               |
| 0.00        | 0.30 | 0.70  | 0.029  | 1.13                               |
| 0.00        | 0.40 | 0.60  | 0.028  | 1.08                               |
| 0.00        | 0.50 | 0.50  | 0.026  | 1.09                               |
| 0.00        | 0.60 | 0.40  | 0.024  | 1.19                               |
| 0.00        | 0.70 | 0.30  | 0.022  | 1.34                               |
| 0.00        | 0.80 | 0.20  | 0.019  | 1.84                               |
| 0.00        | 0.90 | 0.10  | 0.018  | 1.55                               |
| 0.90        | 0.00 | 0.10  | 0.028  | 0.36                               |
| 0.80        | 0.00 | 0.20  | 0.027  | 0.54                               |
| 0.70        | 0.00 | 0.30  | 0.026  | 0.30                               |
| 0.60        | 0.00 | 0.40  | 0.027  | 0.28                               |
| 0.50        | 0.00 | 0.50  | 0.023  | 0.59                               |
| 0.40        | 0.00 | 0.60  | 0.024  | 0.73                               |
| 0.30        | 0.00 | 0.70  | 0.025  | 0.77                               |
| 0.20        | 0.00 | 0.80  | 0.028  | 0.76                               |
| 0.10        | 0.00 | 0.90  | 0.029  | 0.86                               |
| 0.10        | 0.10 | 0.80  | 0.034  | 0.53                               |
| 0.20        | 0.10 | 0.70  | 0.030  | 0.72                               |
| 0.10        | 0.20 | 0.70  | 0.029  | 0.79                               |
| 0.30        | 0.10 | 0.60  | 0.028  | 0.33                               |
| 0.20        | 0.20 | 0.60  | 0.025  | 1.07                               |
| 0.10        | 0.30 | 0.60  | 0.024  | 1.37                               |
| 0.40        | 0.10 | 0.50  | 0.026  | 0.47                               |
| 0.30        | 0.20 | 0.50  | 0.020  | 1.14                               |
| 0.20        | 0.30 | 0.50  | 0.020  | 0.70                               |
| 0.10        | 0.40 | 0.50  | 0.024  | 0.98                               |
| 0.10        | 0.50 | 0.40  | 0.019  | 0.79                               |
| 0.10        | 0.60 | 0.30  | 0.018  | 1.19                               |
| 0.10        | 0.70 | 0.20  | 0.022  | 1.01                               |
| 0.20        | 0.40 | 0.40  | 0.022  | 1.02                               |
| 0.20        | 0.50 | 0.30  | 0.022  | 1.07                               |
| 0.20        | 0.60 | 0.20  | 0.021  | 0.97                               |
| 0.20        | 0.70 | 0.10  | 0.018  | 1.33                               |
| 0.30        | 0.30 | 0.40  | 0.023  | 0.80                               |
| 0.30        | 0.40 | 0.30  | 0.023  | 0.80                               |
| 0.30        | 0.50 | 0.20  | 0.019  | 0.77                               |
| 0.30        | 0.60 | 0.10  | 0.019  | 0.87                               |

---

| composition |      |       |        |                                    |
|-------------|------|-------|--------|------------------------------------|
| IL          | NMP  | Depeg | $x(-)$ | $D (10^{-9} \text{ m}^2/\text{s})$ |
| 0.40        | 0.20 | 0.40  | 0.021  | 0.32                               |
| 0.40        | 0.30 | 0.30  | 0.023  | 0.78                               |
| 0.40        | 0.40 | 0.20  | 0.021  | 0.81                               |
| 0.40        | 0.50 | 0.10  | 0.021  | 0.83                               |
| 0.50        | 0.10 | 0.40  | 0.024  | 0.40                               |
| 0.50        | 0.20 | 0.30  | 0.024  | 0.47                               |
| 0.50        | 0.30 | 0.20  | 0.022  | 0.75                               |
| 0.50        | 0.40 | 0.10  | 0.021  | 1.03                               |
| 0.60        | 0.10 | 0.30  | 0.026  | 0.72                               |
| 0.60        | 0.20 | 0.20  | 0.025  | 0.44                               |
| 0.60        | 0.30 | 0.10  | 0.022  | 0.45                               |
| 0.70        | 0.10 | 0.20  | 0.025  | 0.44                               |
| 0.70        | 0.20 | 0.10  | 0.023  | 0.44                               |
| 0.80        | 0.10 | 0.10  | 0.024  | 0.36                               |

---

### List of Symbols

|     |                                                                             |
|-----|-----------------------------------------------------------------------------|
| $a$ | gas-liquid interfacial area per unit liquid volume, $\text{m}^2/\text{m}^3$ |
| $c$ | concentration, $\text{mol}/\text{m}^3$                                      |
| $d$ | hydraulic diameter, m                                                       |
| $D$ | liquid phase diffusivity, $\text{m}^2/\text{s}$                             |
| $h$ | channel height, m                                                           |
| $k$ | liquid-side mass transfer coefficient, m/s                                  |
| $L$ | length, m                                                                   |
| $M$ | molecular weight, kg/mol                                                    |
| $N$ | amount, mol                                                                 |
| $p$ | pressure, Pa                                                                |
| $R$ | gas constant, J/mol/K                                                       |
| $T$ | temperature, K                                                              |
| $U$ | bubble velocity, m/s                                                        |
| $V$ | volume, $\text{m}^3$                                                        |
| $w$ | channel width, m                                                            |
| $x$ | mole fraction, mol/mol                                                      |
| $z$ | position, m                                                                 |

### Greek letters

|          |                                     |
|----------|-------------------------------------|
| $\alpha$ | pressure drop per unit length, Pa/m |
| $\rho$   | density, $\text{kg}/\text{m}^3$     |

### Dimensionless groups

|       |                                                         |
|-------|---------------------------------------------------------|
| $C_1$ | proportionality constant for caps area mass transfer, – |
| $C_2$ | proportionality constant for film area mass transfer, – |

|              |                                                                  |
|--------------|------------------------------------------------------------------|
| $H$          | Henry's constant, –                                              |
| $\Gamma$     | dimensionless liquid concentration ( $=c_L R T H / p_0$ ), –     |
| $\epsilon_1$ | parameter used in Eqs (3) and (4) ( $=\alpha U / p_0 k_L a$ ), – |
| $\epsilon_2$ | parameter used in Eqs (3) and (4) ( $=V_{G0} H / V_L$ ), –       |
| $\eta$       | dimensionless position ( $=z k_L a / U$ ), –                     |
| $\Theta$     | dimensionless gas volume ( $=1 - H(V_{G0} - V_G) / V_L$ ), –     |

#### Subscripts

|     |             |
|-----|-------------|
| 0   | initial     |
| eq  | equilibrium |
| G   | gas         |
| L   | liquid      |
| S   | solvent     |
| ref | reference   |
| out | outlet      |

#### Movie Details

The included movie (separately available in the supplementary information) measures  $1200 \times 904$  pixels, where one pixel corresponds to a square of  $7.1 \times 7.1 \mu\text{m}$ . The movie was recorded at 50 frames per second and plays at 5 frames per second. Experimental conditions: solvent octanol, liquid flow rate  $1.1 \mu\text{L}/\text{min}$ , feed pressure 0.68 barg.
